# Supplementary material for: Adherence to the Mediterranean Diet in Children and Adolescents and Association with Multiple Outcomes: An Umbrella Review
Source: MDPI journal article supplement (doi:10.3390/healthcare12040449), 2024-02-09
Supplement: s1 [file s1]

Table S1 Risk of Bias Assessment

| Authors                    | Item 1 | Item 2 | Item 3 | Item 4 | Item 5 | Item 6 | Item 7 | Item 8 | Item 9 | Item 10 | Item 11 | Score | Overall     |
|----------------------------|--------|--------|--------|--------|--------|--------|--------|--------|--------|---------|---------|-------|-------------|
| Romero Robles et al. [24]  | 1      | 1      | 1      | 1      | 1      | 1      | 1      | 1      | NA     | 1       | 1       | 10    | Low risk    |
| Garcia Marcos et al. [25]  | 1      | -      | 1      | 1      | 0      | 0      | -      | 1      | 0      | 1       | 1       | 6     | Medium risk |
| Teixeira et al. [26]       | 1      | 1      | 1      | 1      | 1      | 1      | 1      | 1      | NA     | 1       | 1       | 10    | Low risk    |
| Bujtor et al. [27]         | 1      | 1      | 1      | 1      | 1      | -      | -      | 0      | NA     | 1       | 1       | 7     | Medium risk |
| García-Hermoso et al. [28] | 1      | 1      | 1      |        | 1      | -      | 1      | 1      | 1      | 1       | 1       | 10    | Low risk    |
| Koumpagioti et al. [29]    | 1      | 1      | 0      | 1      | 0      | 0      | 1      | 1      | NA     | 0       | 1       | 6     | Medium risk |
| Lassale et al. [30]        | 1      | 1      | 1      | 0      | 1      | -      | -      | 1      | NA     | -       | 1       | 6     | Medium risk |
| LV et al. [31]             | 1      | 1      | 1      | 1      | 1      | 1      | 1      | 1      | 1      | -       | 1       | 10    | Low risk    |
| Eslami et al. [32]         | 1      | 1      | 1      | 1      | 1      | 1      | 1      | 1      | NA     | 1       | 1       | 10    | Low risk    |
| Papamichael et al. [33]    | 1      | 1      | 1      | 1      | 1      | 1      | 1      | 1      | NA     | 1       | 1       | 10    | Low risk    |
| Iaccarino et al. [34]      | 1      | -      | 1      | 1      | 1      | 1      | 1      | 1      | NA     | 1       | 1       | 9     | Low risk    |

NA: Not Applicable
